# Supplementary material
Source: PubMed Central journal article supplement (PMC3982972)
Supplement: am4027423_si_001.pdf [file am4027423_si_001.pdf]

## Supplementary Information

### **An Injectable, Calcium Responsive Composite Hydrogel for the Treatment of Acute Spinal Cord Injury**

*Christopher A. McKay<sup>a</sup>, Rebecca D. Pomrenke<sup>a</sup>, Joshua S. McLane<sup>b</sup>, Nicholas J. Schaub<sup>a</sup>, Elise K. DeSimone<sup>a</sup>, Lee A. Ligon<sup>b</sup>, Ryan J. Gilbert<sup>a,\*</sup>*

<sup>a</sup>Center for Biotechnology and Interdisciplinary Studies, Department of Biomedical Engineering, Rensselaer Polytechnic Institute, Troy NY, 12180-3590

<sup>b</sup>Center for Biotechnology and Interdisciplinary Studies, Department of Biology, Rensselaer Polytechnic Institute, Troy, NY, 12180-3590

\*Corresponding Author: E-mail: gilber2@rpi.edu, Phone: (518)-276-2032

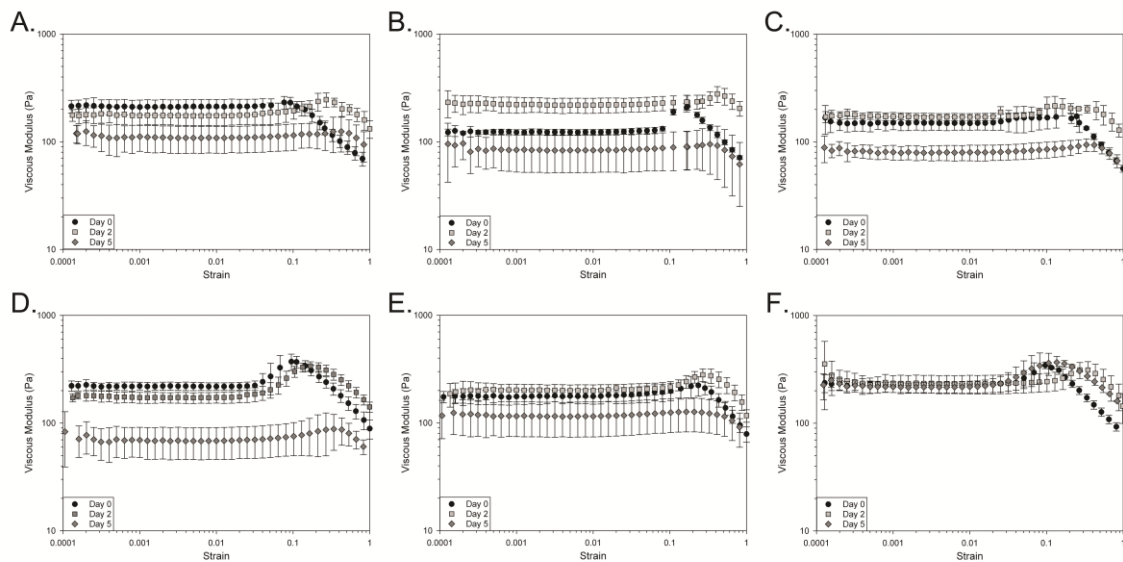

**Supplementary Figure 1.** A-F) Viscous modulus obtained from strain sweeps *after in situ* gelation modeling with normal  $\text{Ca}^{2+}$  concentration (1.8 mM), demonstrating the effect of long term incubation in  $\text{Ca}^{2+}$  containing media. **The delayed increase in viscous modulus following incubation complements the increased LVE limit observed in Figure 2. This provides further evidence that incubating hydrogels in  $\text{Ca}^{2+}$  containing media promotes increased hydrogel stability and a change in internal crosslinking structure in response to  $\text{C}^{2+}$  exposure.** (A) A5/C0/G0/Ca22, (B) A5/C0/G0/Ca22, (C) A5/C125/G1/Ca24, (D) A25/C125/C1/Ca23, (E) A5/C25/C01/Ca20, (F) and A25/C25/C05/Ca18. n = 3, mean  $\pm$  standard deviation.

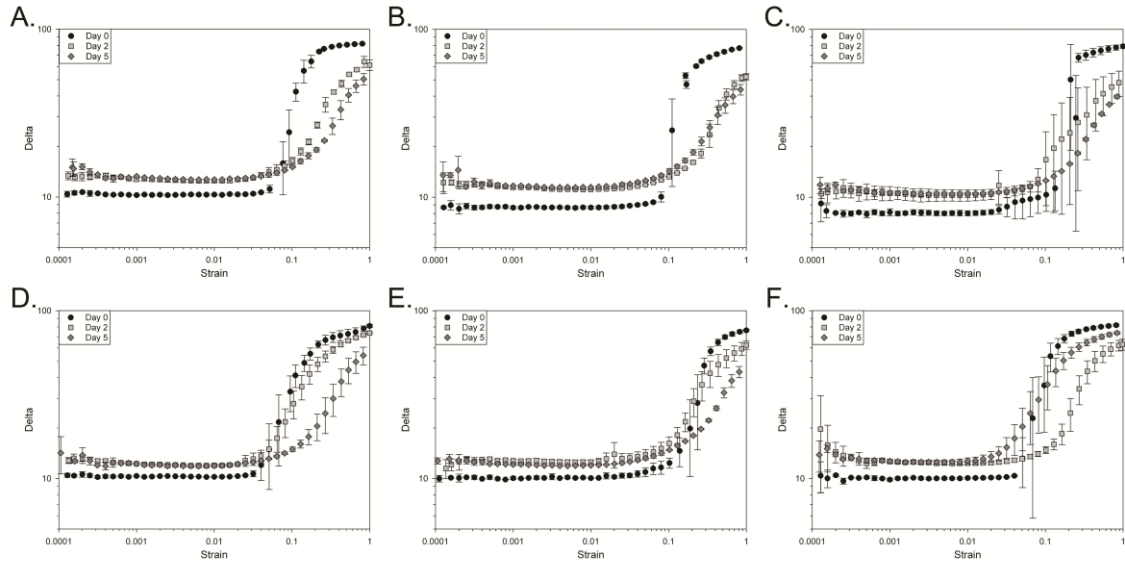

**Supplementary Figure 2.** Phase angle ( $\delta$ ) obtained from strain sweeps **after *in situ* gelation modeling with normal  $\text{Ca}^{2+}$  concentration (1.8 mM)**, demonstrating the effect of long term incubation in  $\text{Ca}^{2+}$  containing media.  $\delta$  is the ratio of the viscous modulus to the elastic modulus ( $\delta = \tan^{-1}(\text{viscous}/\text{elastic})$ ) and provides information about the relative viscoelastic nature of the hydrogel. In this case, a lower value of  $\delta$  indicates a more **elastic, solid-like material**. **The delayed increase in phase angle ( $\delta$ ) following incubation complements the increased LVE limit observed in Figure 2 and delayed increase in viscous modulus observed in Supplementary Figure 1.** Hydrogels that have been incubated in  $\text{Ca}^{2+}$  exhibit a more elastic nature at higher strains than non-incubated samples, indicating an **increase in hydrogel stability and a change in the internal crosslinking structure in response to  $\text{Ca}^{2+}$  exposure.** (A) A5/C0/G0/Ca22, (B) A5/C0/G0/Ca22, (C) A5/C125/G1/Ca24, (D) A25/C125/C1/Ca23, (E) A5/C25/C01/Ca20, (F) and A25/C25/C05/Ca18.  $n = 3$ , mean  $\pm$  standard deviation.

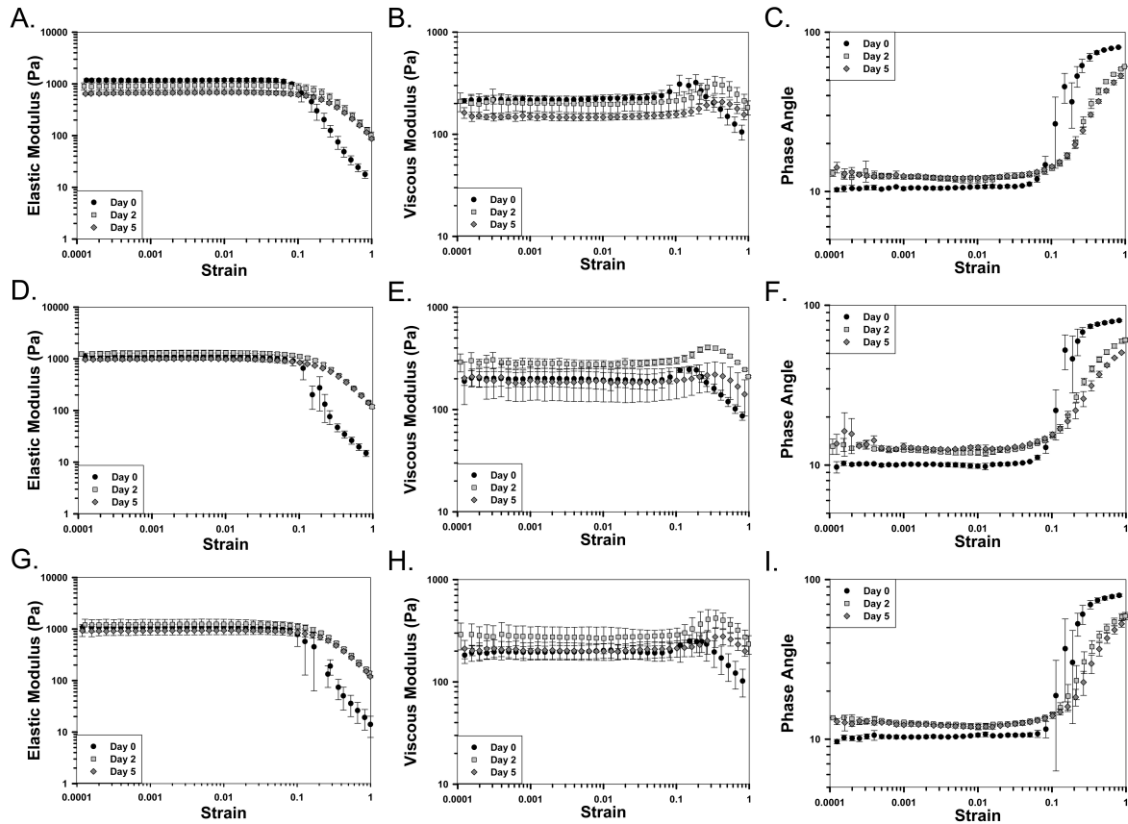

**Figure 3. A-I) Rheological behavior of hydrogels following *in situ* gelation modeling with elevated  $\text{Ca}^{2+}$  concentration (6 mM) demonstrating the effect of long term incubation in  $\text{Ca}^{2+}$  containing media. Rheological behavior after *in situ* modeling with elevated  $\text{Ca}^{2+}$  is very similar to that observed following incubation with normal  $\text{Ca}^{2+}$  concentration (1.8 mM). Strain sweeps indicate an increase in the LVE limit (A,D,G) as well as a delay in the increase of the viscous modulus (B,E,H) and phase angle (C,F,I) of hydrogels in a composition manner following incubation in a  $\text{Ca}^{2+}$  containing media. (A-C) A5/C0/G0/Ca22, (D-F) A5/C125/G1/Ca24 and (G-I) A5/C25/G01/Ca20.  $n = 3$ , mean  $\pm$  standard deviation.**

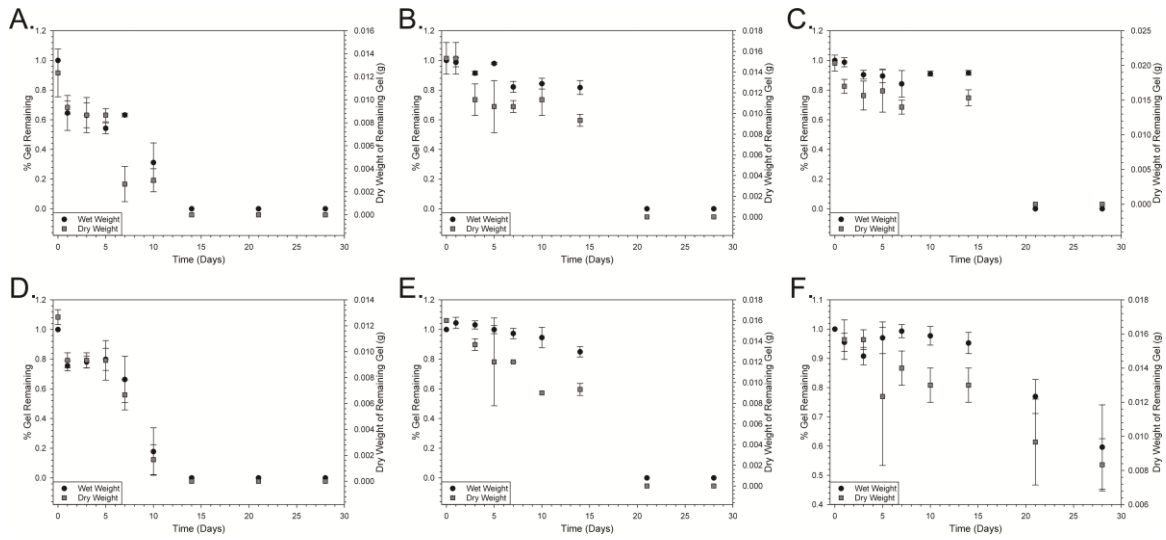

**Supplementary Figure 4.** Degradation profile of alginate/chitosan hydrogels. Wet weight at each time point is normalized to the original weight of the gel at day 0 and is given as the percent of gel remaining. Dry weight at each time point is provided in grams of hydrogel remaining following lyophilization. A-F) Degradation profiles for (A) A5/C0/G0/Ca22, (B) A25/C0/G0/Ca22, (C) A5/C125/G1/Ca24, (D) A25/C125/G1/Ca23, (E) A5/C25/G01/Ca20, (F) A25/C25/G05/Ca18 **hydrogels**.  $n = 3$ , mean  $\pm$  standard deviation
